# Supplementary material
Source: bioRxiv or medRxiv preprint supplement (https://medrxiv.org/highwire/filestream/91256/field_highwire_adjunct_files/0/2020.07.25.20146431-1.pdf)

# Supplementary Figure 1

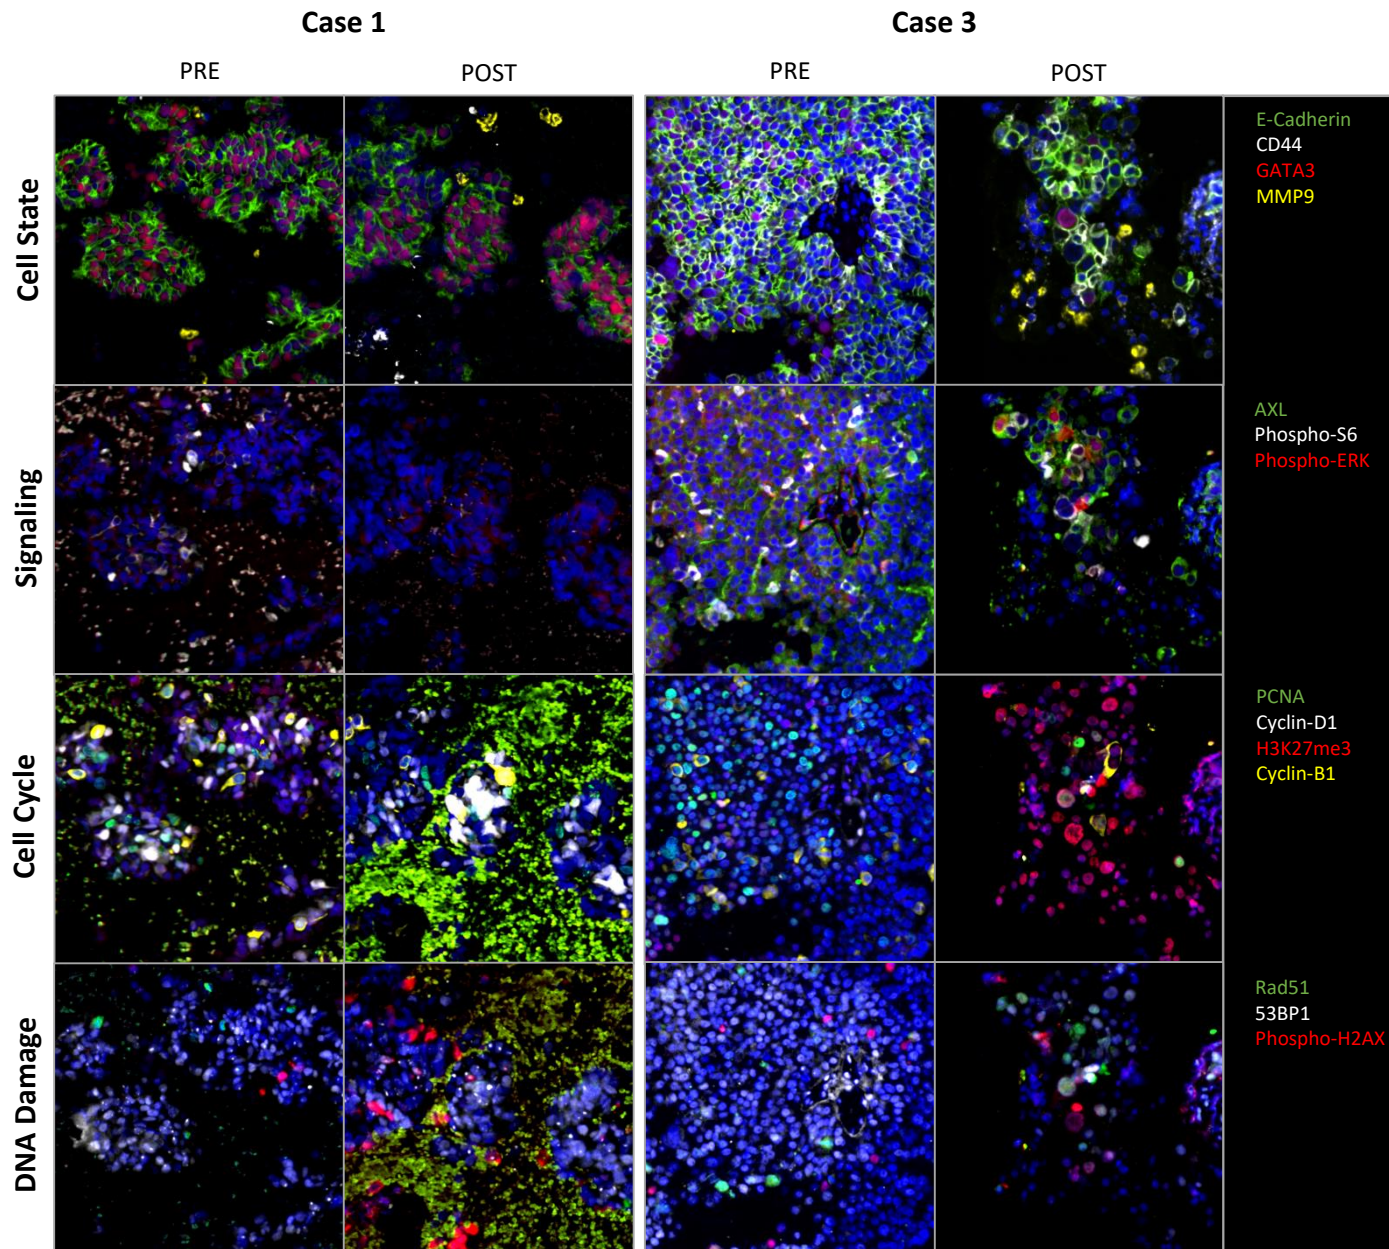

Supplement: Supplementary file [file 2020.07.25.20146431-1.pdf]
